# Supplementary material
Source: PubMed Central journal article supplement (PMC5053620)
Supplement: NIHMS711113-supplement-1.pdf [file NIHMS711113-supplement-1.pdf]

## Supplemental Figure 1

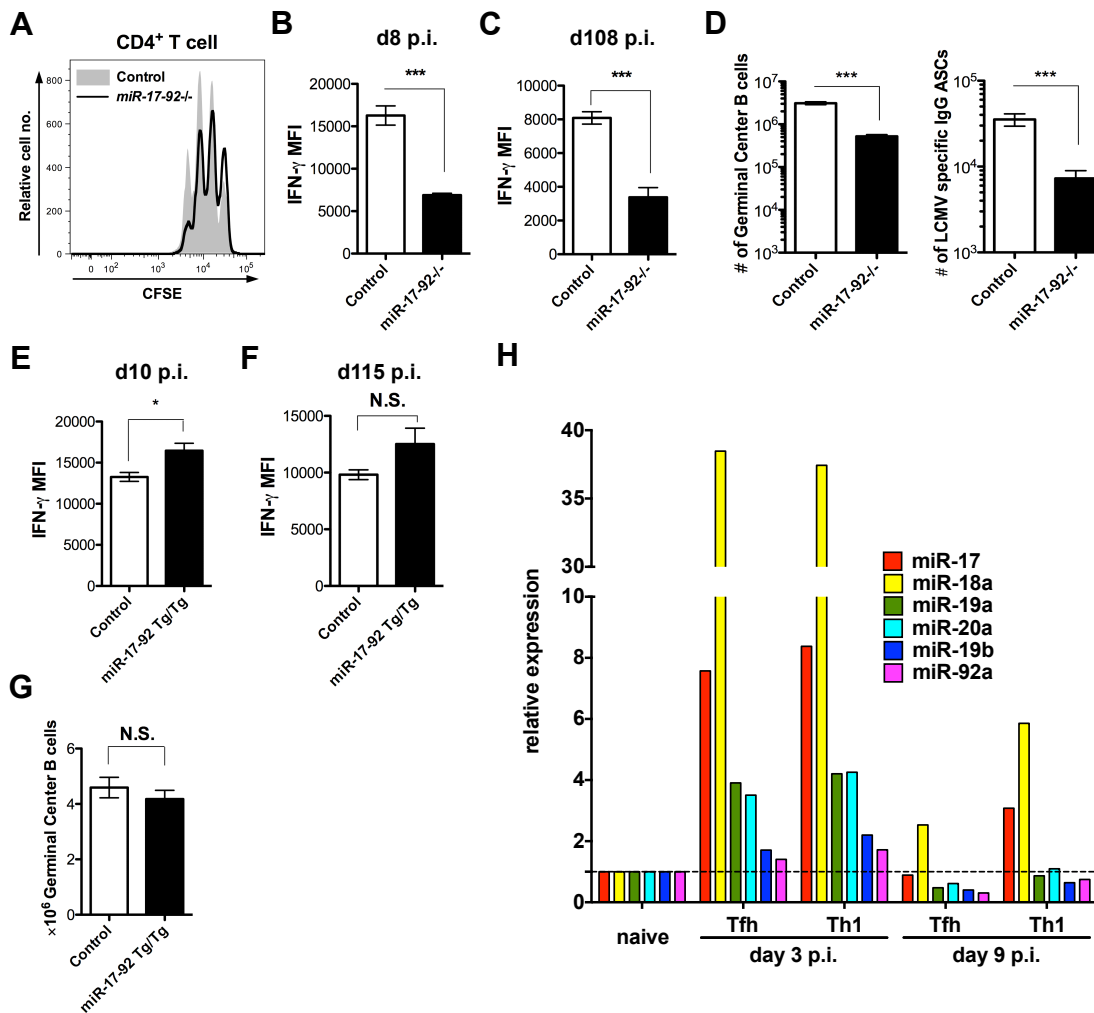

**Supplemental Figure 1: miR-17-92 deficiency impairs the proliferative capacity and IFN- $\gamma$  production of CD4 T cells** (A) Naïve CD4 T cells purified from *miR-17-92*<sup>-/-</sup> and control mice were labeled with CFSE, and stimulated with plate-bound anti-CD3 and soluble anti-CD28 for 48 hours. The extent of cell divisions is indicated by CFSE dilution. (B-D) *miR-17-92*<sup>-/-</sup> and the respective control mice were infected with LCMV Armstrong. (B,C) Splenocytes were stimulated with GP<sub>61-80</sub> peptide for 5 hours and CD4 T cells were intracellularly stained for IFN- $\gamma$ . IFN- $\gamma$  expression in IFN- $\gamma$ <sup>+</sup> CD4 T cells as measured by mean fluorescence intensity (MFI) at the indicated time points post infection. (D) Number of germinal center B cells and LCMV-specific IgG antibody secreting cells (ASCs) per spleen on day 8 p.i.. (E-G) *miR-17-92* Tg/Tg and the respective control mice were infected with LCMV Armstrong. (E,F) Splenocytes were stimulated with GP<sub>61-80</sub> peptide for 5 hours and CD4 T cells were intracellularly stained for IFN- $\gamma$ . IFN- $\gamma$  expression in IFN- $\gamma$ <sup>+</sup> CD4 T cells as measured by mean fluorescence intensity (MFI) at the indicated time points post infection. (G) Number of germinal center B cells cells per spleen on day 8 p.i.. Results are representative of at least three independent experiments with n $\geq$ 3. (H) QRT-PCR analysis of the expression of individual members in the miR-17-92 cluster in naïve, Tfh and Th1 SMARTA cells on day 3 and day 8 p.i.. Bars represent the fold changes relative to naïve. Sno-142 was used as normalization control. Results are representative of two independent experiments.

## Supplemental Figure 2

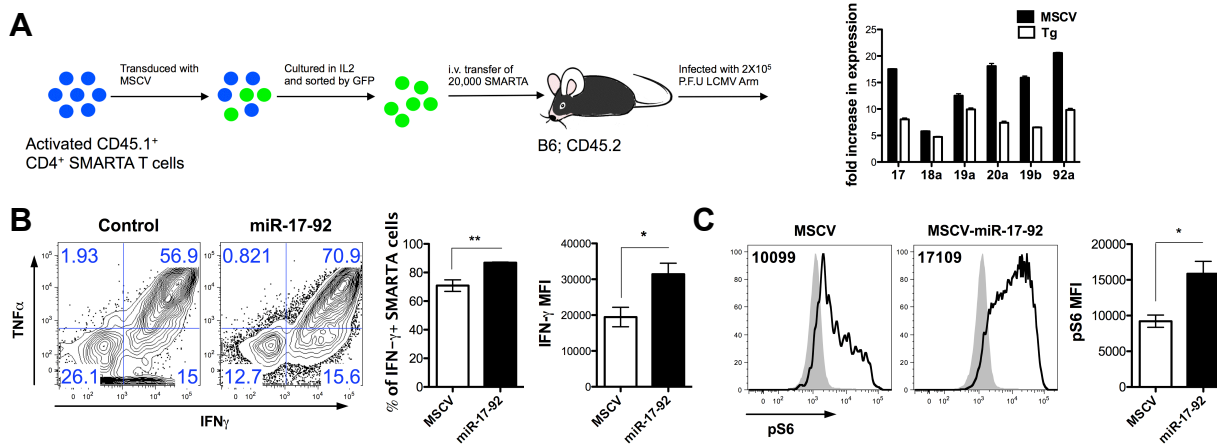

**Supplemental Figure 2: The effect of miR-17-92 over-expression on LCMV-specific CD4 T cell expansion and differentiation is cell autonomous.** (A) SMARTA cells were transduced with MSCV construct with or without miR-17-92 insert and transferred to C57BL/6 recipients. Over-expression was confirmed by QRT-PCR. On day 8 p.i., splenocytes were collected for analysis. (B) FACS plots of IFN- $\gamma$  and TNF- $\alpha$  staining (gated on SMARTA cells), the frequency of IFN- $\gamma$ <sup>+</sup> SMARTA cells, and IFN- $\gamma$  MFI of IFN- $\gamma$ <sup>+</sup> SMARTA cells. (C) FACS analysis of phosphorylated ribosome protein S6 in SMARTA cells (day 6 p.i.). Results are representative of at least three independent experiments with n $\geq$ 3.
